# Supplementary material for: Self-assembled molecular patterns of fatty acid on graphite in the presence of metal ions
Source: Royal Society of Chemistry journal article supplement (doi:10.1039/b604213a), 2006-01-01

## Supporting Information

# Self-assembled molecular patterns of fatty acid in the presence of metal ions

Wen-fei Dong,<sup>1,2</sup> Ruomiao Wang,<sup>3</sup> Guangzhao Mao,<sup>3,\*</sup> and Helmuth Möhwald<sup>2</sup>

<sup>1</sup>Key Laboratory of Automobile Materials (Jilin University), Ministry of Education  
and Department of Materials Science and Engineering, Jilin University, Changchun,  
130025, China;

<sup>2</sup>Max Planck Institute of Colloids and Interfaces, Golm/Potsdam, D-14476, Germany;

<sup>3</sup>Department of Chemical Engineering and Materials Science, Wayne State University,  
5050 Anthony Wayne Drive, Detroit, Michigan 48202, USA

\* Corresponding author: e-mail: gzmao@eng.wayne.edu

**Figure S1.** FTIR of (a) NiAA complex and (b) NiAA solution in the range of 1300–1800  $\text{cm}^{-1}$ . The concentration of the metal ion is about 0.5 mM and that of AA is 1 mM. Complexes are prepared at low temperature.

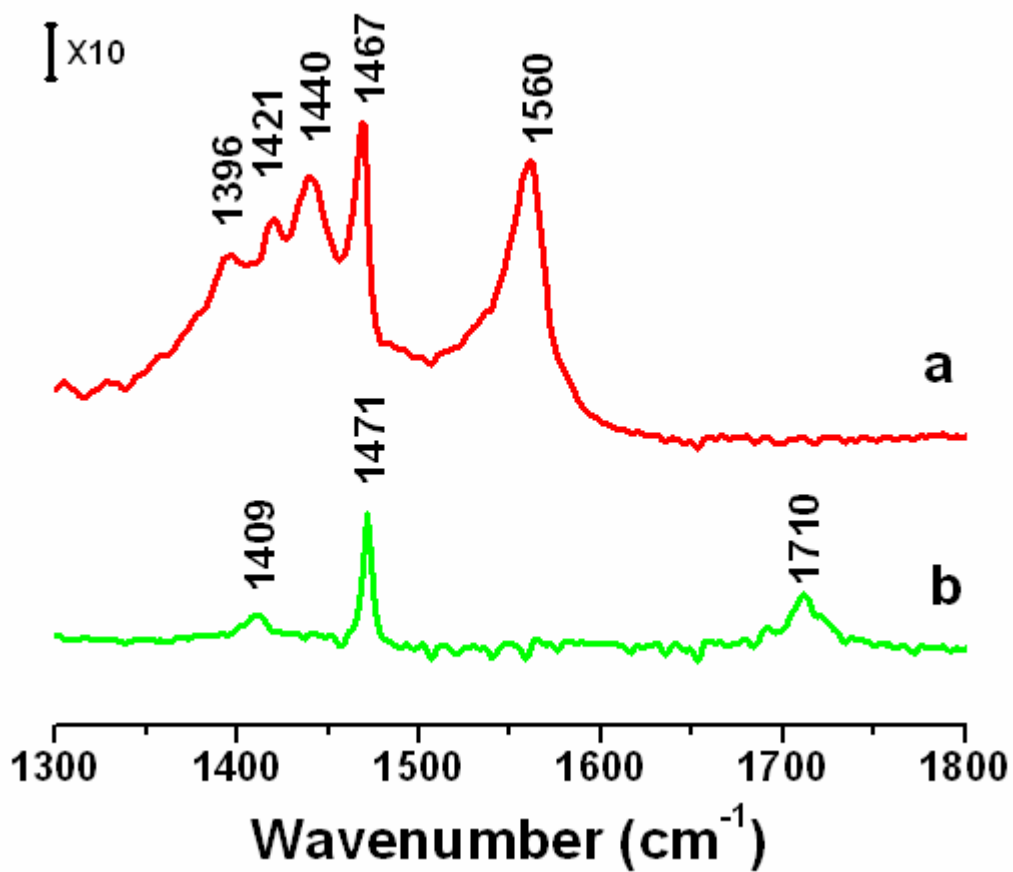

**Figure S2.** FTIR of solutions of FeAA, MnAA, and CoAA in the range of 1300–1800 and 2600–3200  $\text{cm}^{-1}$ . The concentration of the metal ions is about 0.05 mM and that of AA is 0.1 mM.

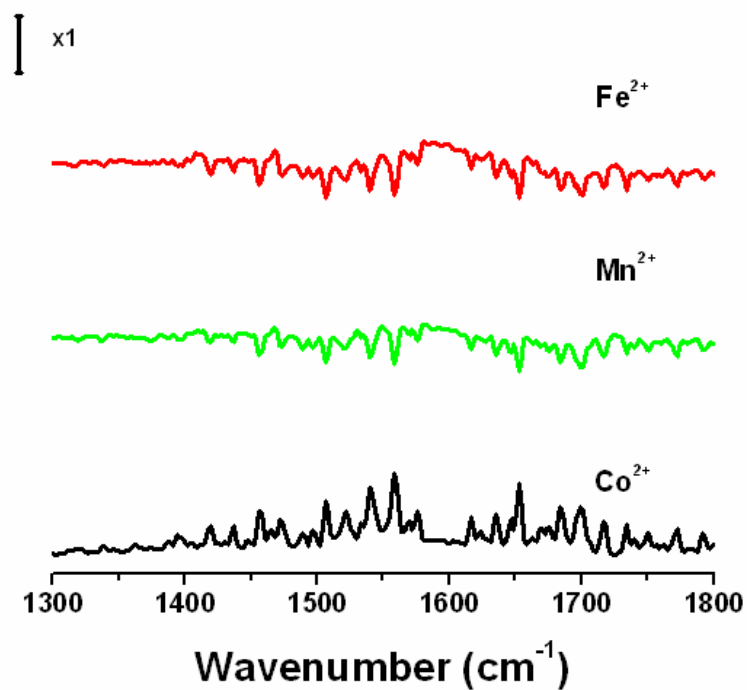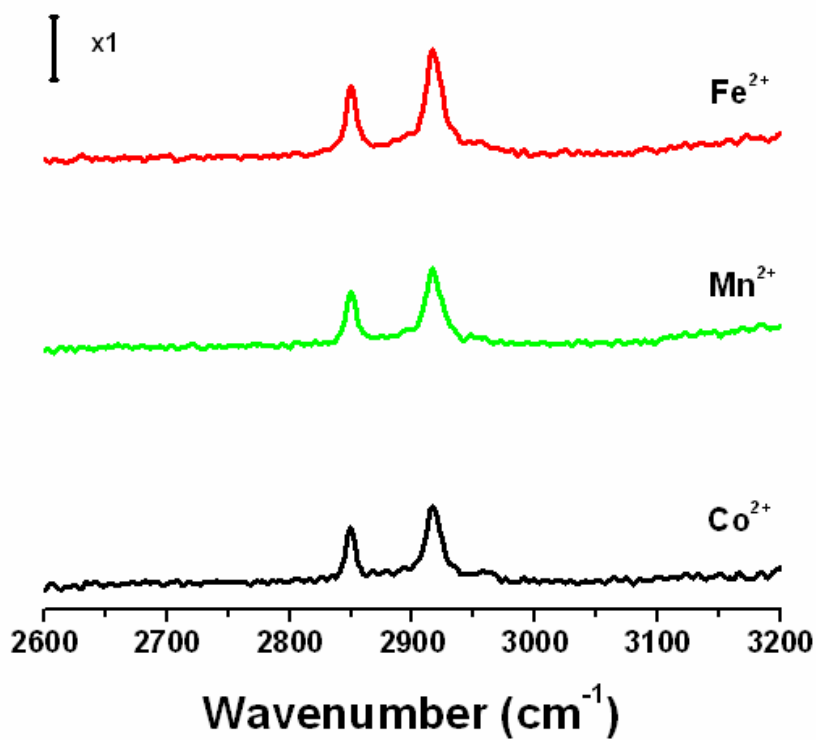

**Table S1.** The assignment of the peaks of the metal–ligand complexes.

| AA   | CuAA | CdAA | ZnAA | NiAA | Assignment                                      |
|------|------|------|------|------|-------------------------------------------------|
| 2954 | 2952 | 2954 | 2952 |      | Asymmetric stretching mode of CH <sub>3</sub>   |
| 2914 | 2914 | 2918 | 2916 |      | Asymmetric stretching mode of CH <sub>2</sub>   |
| 2846 | 2848 | 2848 | 2846 |      | Symmetric stretching mode of CH <sub>2</sub>    |
| 1700 |      |      |      |      | C=O stretching mode of the carboxylic groups    |
|      | 1587 | 1537 | 1537 | 1560 | Asymmetric COO stretching band                  |
| 1471 | 1471 | 1471 |      | 1467 | CH <sub>2</sub> scissoring mode of alkyl chains |
| 1461 |      | 1461 | 1461 |      | CH <sub>2</sub> scissoring mode of alkyl chains |
|      | 1444 |      |      | 1440 | Bending mode of COH <sup>*</sup>                |
| 1429 |      |      |      |      | Symmetric C=O stretching mode                   |
|      | 1421 | 1423 |      | 1421 | Symmetric COO stretching mode                   |
| 1412 |      |      |      |      | Bending mode of CaH <sub>2</sub>                |
|      |      | 1396 | 1396 | 1396 | Bending mode of CaH <sub>2</sub>                |
|      | 1383 |      | 1383 |      | Bending mode of CH <sub>3</sub>                 |
|      |      | 1377 |      |      | Bending mode of CH <sub>3</sub>                 |

\* Note, see J. Baran, M. K. Marchewka, H. Ratajczak, A. Y. Borovikov, V. N. Byckov, A. G. Naumovets, A. V. Podzelinsky, G. A. Puchkovskaya and V. I. Styopkin, *Thin Solid Films*, 1995, **254**, 229.

**Scheme S1.** Four types of metal–ligand interaction.

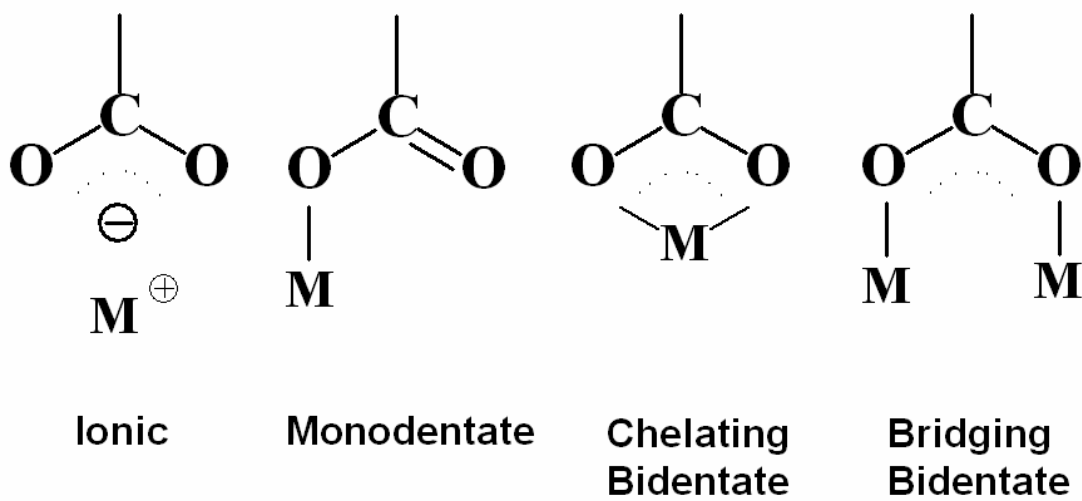

Supplement: b604213a.pdf [file b604213a.pdf]
